# Supplementary material for: Muddy sand and sandy mud on the distal Mississippi fan: Implications for lobe depositional processes
Source: Oxford University Press journal article supplement (doi:10.1130/ges01580.1), 2018-04-11
Supplement: ges01580_suppfiles.zip [file ges01580_suppfiles.zip]

|     |  |  |  |  |        |       |  |
|-----|--|--|--|--|--------|-------|--|
| 142 |  |  |  |  | 109.26 | 18555 |  |
| 144 |  |  |  |  | 109.44 | 18555 |  |
| 146 |  |  |  |  | 145.2  | 18553 |  |
| 148 |  |  |  |  |        |       |  |
| 150 |  |  |  |  |        |       |  |



|  |
|--|
|  |
|  |
|  |
|  |
|  |
|  |
|  |
|  |
|  |
