# Supplementary figures and images for: Muddy sand and sandy mud on the distal Mississippi fan: Implications for lobe depositional processes
Source: Oxford University Press journal article supplement (doi:10.1130/ges01580.1), 2018-04-11

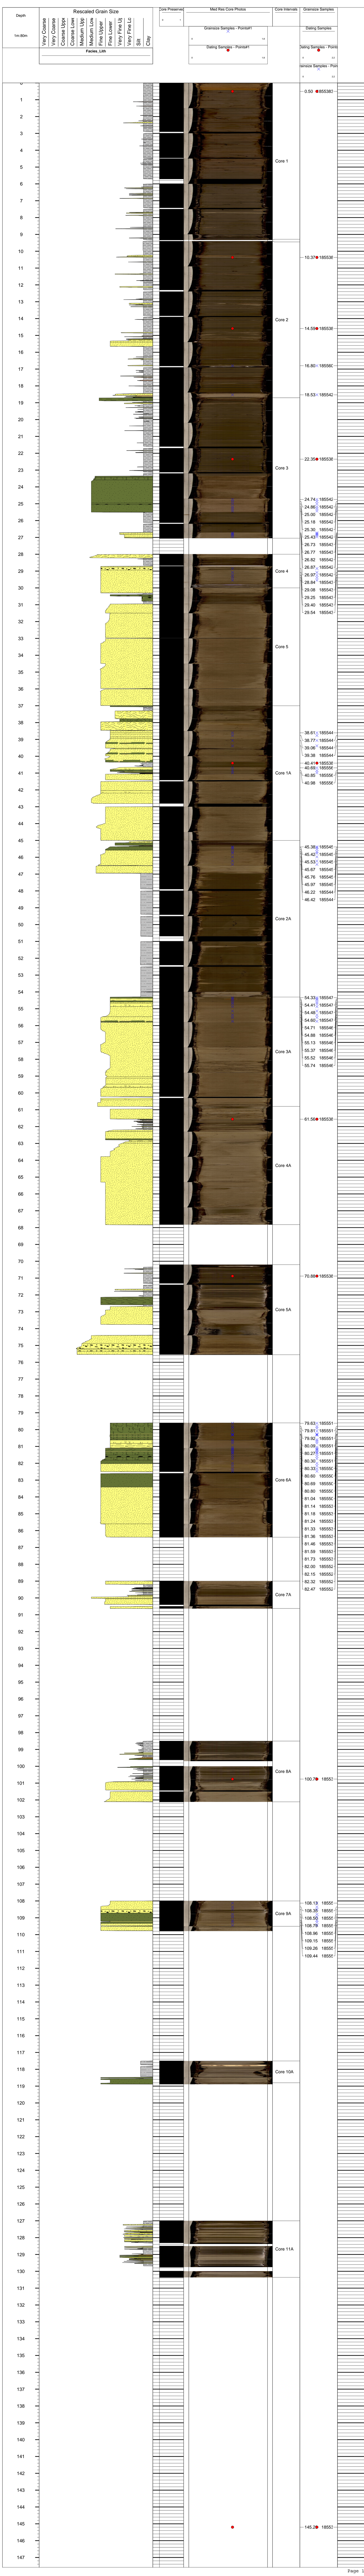







[illegible]

Supplement: ges01580_suppfiles.zip [file ges01580_suppfiles.zip]

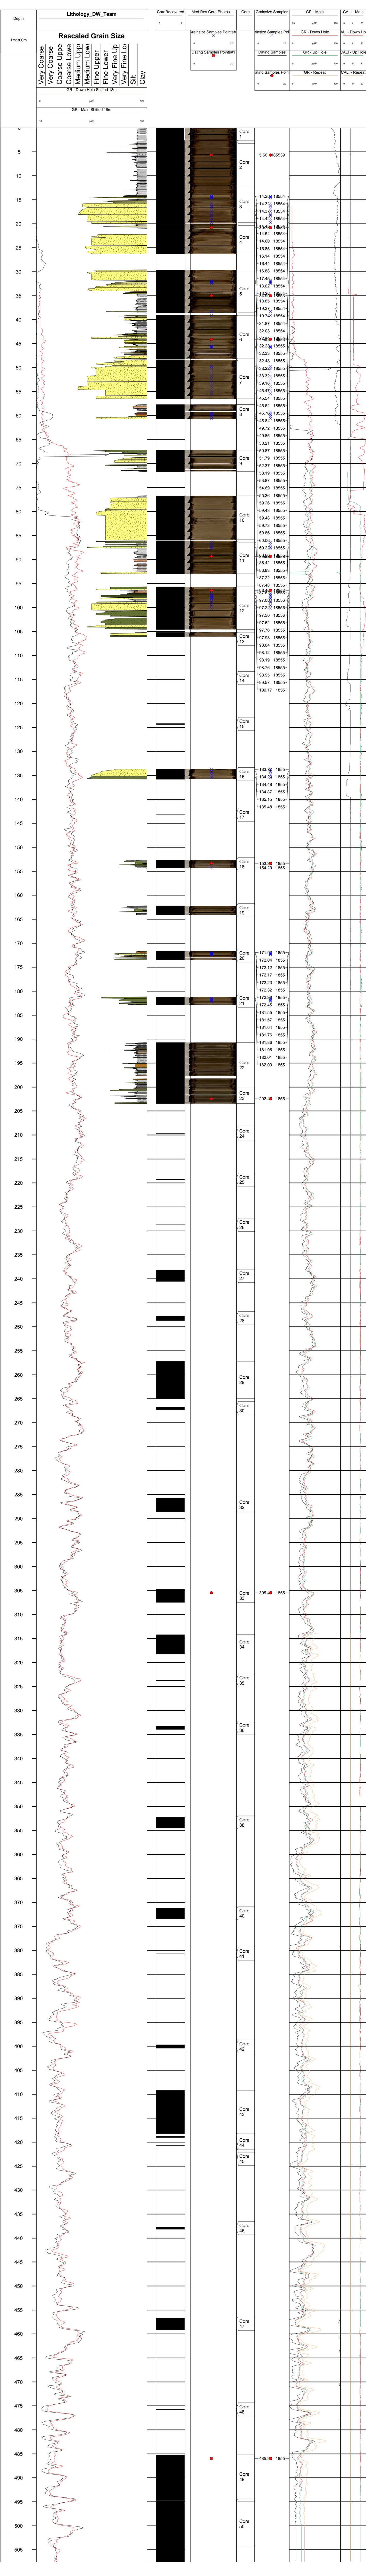

|     |                                                                                  |  |                                                                                  |  |         |  |                                                                                  |                                                                                  |
|-----|----------------------------------------------------------------------------------|--|----------------------------------------------------------------------------------|--|---------|--|----------------------------------------------------------------------------------|----------------------------------------------------------------------------------|
| 510 |  |  |  |  | Core 51 |  |  |  |
| 515 |                                                                                  |  |                                                                                  |  |         |  |                                                                                  |                                                                                  |
| 520 |                                                                                  |  |                                                                                  |  | Core 52 |  |                                                                                  |                                                                                  |

Supplement: ges01580_suppfiles.zip [file ges01580_suppfiles.zip]

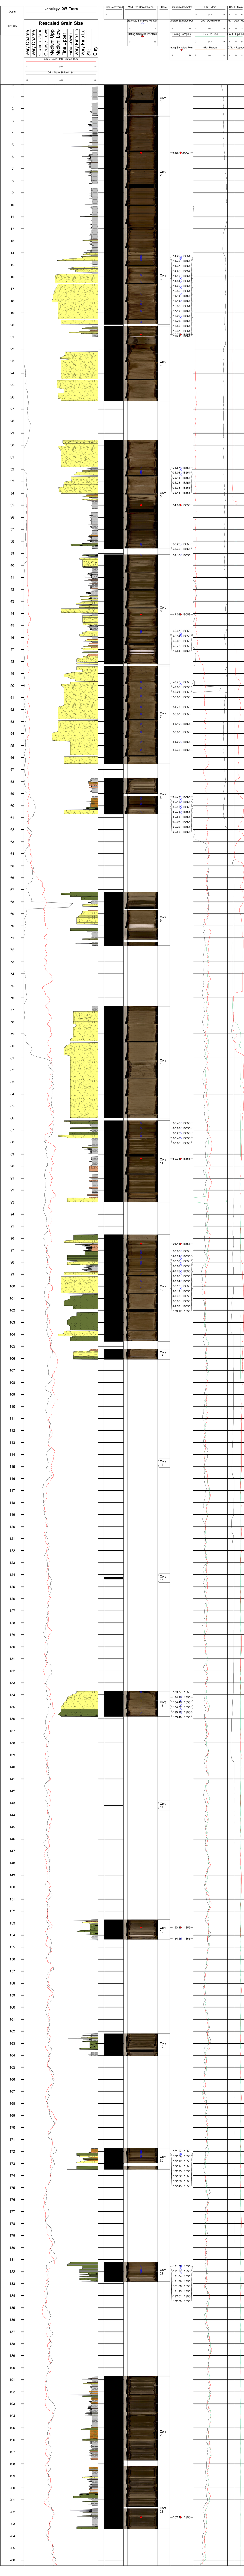

Supplement: ges01580_suppfiles.zip [file ges01580_suppfiles.zip]
